# Supplementary material for: Repurposing pyridoxamine for therapeutic intervention of intravascular cell-cell interactions in mouse models of sickle cell disease
Source: PubMed Central journal article supplement — Haematologica. 2019 Oct 31;105(10):2407–19. doi: 10.3324/haematol.2019.226720 (PMC7556679; doi:10.3324/haematol.2019.226720), 2019-10-31
Supplement: 2019_226720-DisclosuresContributions.pdf [file 2019_226720-DisclosuresContributions.pdf]

Haematologica  
HAEMATOL/2019/226720  
Version 4

Repurposing pyridoxamine for therapeutic intervention of intravascular  
cell-cell interactions in mouse models of sickle cell disease

Jing Li, Si-yeon Jeong, Bei Xiong, Alan Tseng, Andrew B. Mahon,  
Steven Isaacman, Victor R. Gordeuk, and Jaehyung Cho

Disclosures: A.B.M. and S.I. are employees of PHD Biosciences. Other authors declare no competing financial interests.

Contributions: J.L. and B.X.: performed research, collected and analyzed data, and wrote the draft; S.J.: performed research and collected and analyzed data; A.T.: performed research, collected and analyzed data, and helped to edit the manuscript; A.B.M. and S.I.: initiated and designed research; V.R.G.: provided blood of SCD patients and helped to edit the manuscript; and J.C.: initiated and designed research, analyzed data, and wrote the manuscript.
